# Supplementary material for: Carbon nanotubes@silicone solar evaporators with controllable salt-tolerance for efficient water evaporation in a closed system
Source: Royal Society of Chemistry journal article supplement (doi:10.1039/d1ta03920b), 2021-01-01
Supplement: d1ta03920b1.pdf [file d1ta03920b1.pdf]

## Supporting Information

### **Carbon nanotubes@silicone solar evaporators with controllable salt-tolerance for efficient water evaporation in closed system**

*Tao Hu<sup>a#</sup>, Kai Chen<sup>a#</sup>, Lingxiao Li<sup>a</sup> and Junping Zhang<sup>\*a,b</sup>*

<sup>a</sup> Center of Eco-Material and Green Chemistry, Lanzhou Institute of Chemical Physics, Chinese Academy of Sciences, 730000 Lanzhou, P.R. China

<sup>b</sup> Center of Materials Science and Optoelectronics Engineering, University of Chinese Academy of Sciences, Beijing 100049, P.R. China

<sup>#</sup> These authors contributed equally to this work.

\* E-mail address: [jpzhang@licp.cas.cn](mailto:jpzhang@licp.cas.cn)

## Calculation of heat loss

The heat loss of the solar evaporation device is attributed to radiation, convection and conduction.

a) The radiative heat loss is calculated by the Stefan-Boltzmann equation.<sup>1</sup>

$$Q_{\text{rad}} = \epsilon A \sigma (T^4 - T_2^4) \quad (\text{S1})$$

Where  $Q_{\text{rad}}$  represents heat flux,  $\epsilon$  is the emissivity,  $A$  is the surface area,  $\sigma$  is the Stefan-Boltzmann constant ( $5.67 \times 10^{-8} \text{ W m}^{-2} \text{ K}^{-4}$ ),  $T$  (318.15 K) is the average surface temperature of as-prepared sample for a steady state of  $\sim 1$  h, and  $T_2$  (310.15 K) is the ambient temperature upward the absorber under 1 sun irradiation. According to equation (S1), the radiation loss is  $\sim 5$  % of the solar flux (1 sun =  $1000 \text{ W m}^{-2}$ ).

b) The convective heat loss is defined by Newton' law of cooling.<sup>2</sup>

$$Q_{\text{conv}} = hA(T - T_2) \quad (\text{S2})$$

Where  $Q_{\text{conv}}$  denotes the heat energy,  $h$  is the convection heat transfer coefficient, which is  $\sim 5 \text{ W m}^{-2} \text{ K}$ .  $\Delta T$  is the different value between the average surface temperature and the ambient temperature upward the absorber ( $\Delta T = 8 \text{ K}$ ). According to equation (S2), the convection heat loss is calculated to be  $\sim 4$  %.

c) The conductive heat loss is calculated according to the following equation.<sup>3</sup>

$$Q_{\text{cond}} = Cm\Delta T \quad (\text{S3})$$

Where  $Q_{\text{cond}}$  is the heat energy,  $C$  is the specific heat capacity of water ( $4.2 \text{ J } ^\circ\text{C}^{-1} \text{ g}^{-1}$ ),  $m$  (80 g) is the water weight, and  $\Delta T$  ( $0.6 \text{ } ^\circ\text{C}$ ) is the temperature difference of pure water after and before solar illumination under 1 sun for 1 h. Therefore, the conductive heat loss is calculated to be  $\sim 3$ %.

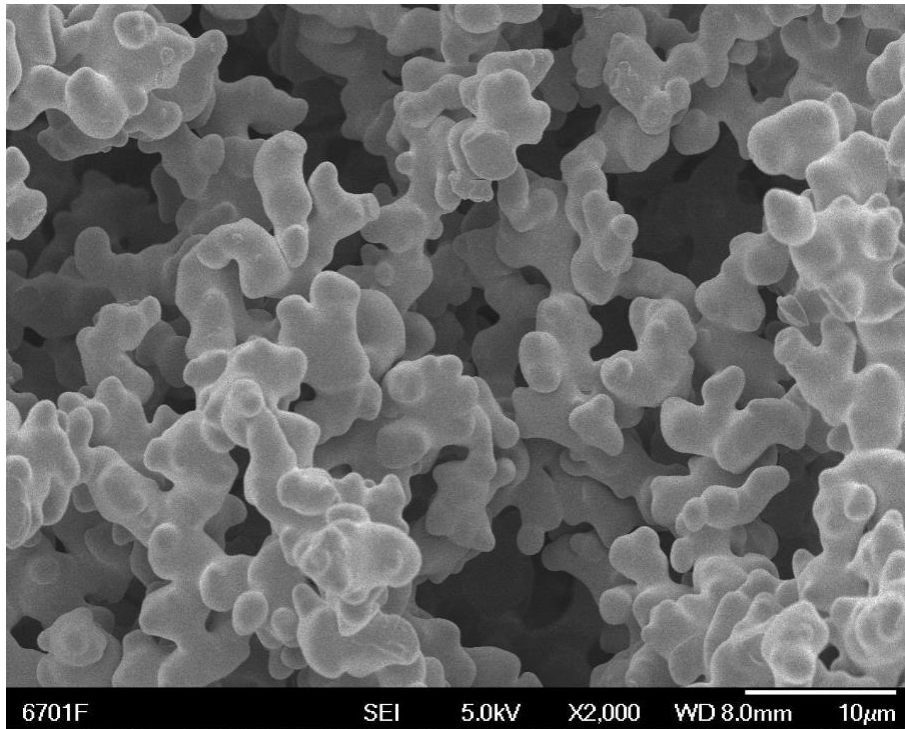

**Fig. S1** SEM image of the silicone sponge.

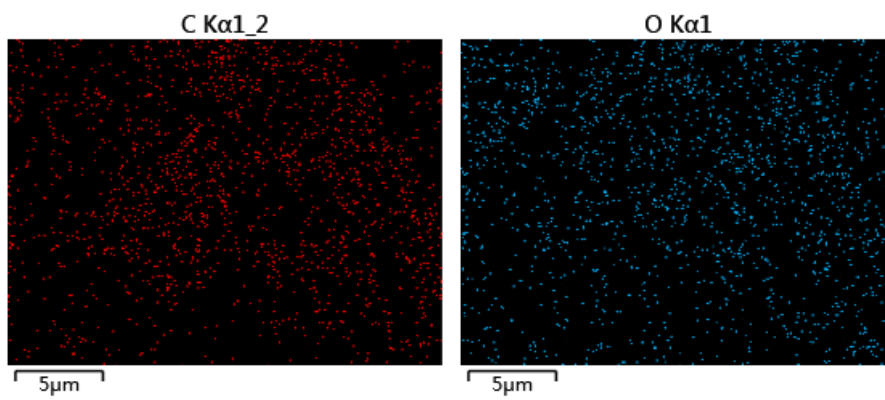

**Fig. S2** Surface elemental mapping of the CNTs@silicone solar evaporator<sup>6.0</sup>.

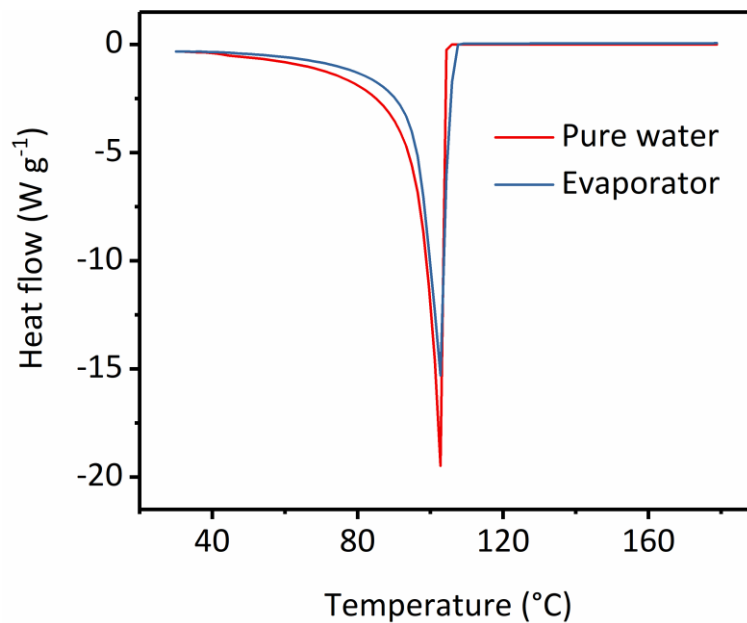

**Fig. S3** Differential scanning calorimetry curves of pure water and water in the evaporator.

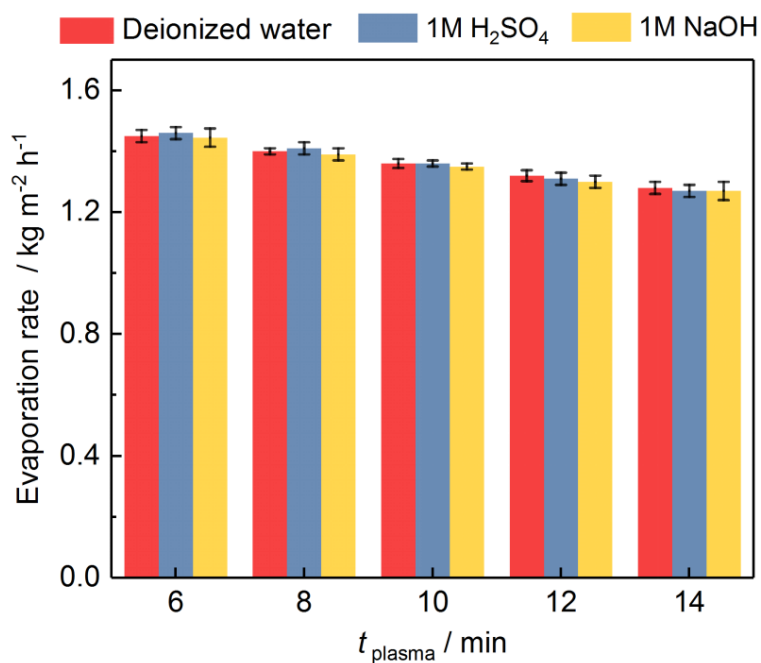

**Fig. S4** Evaporation rate of deionized water, 1 M  $\text{H}_2\text{SO}_4$  aqueous solution and 1 M NaOH aqueous solution under 1 sun illumination in 1 h in the presence of different CNTs@silicone solar evaporators.

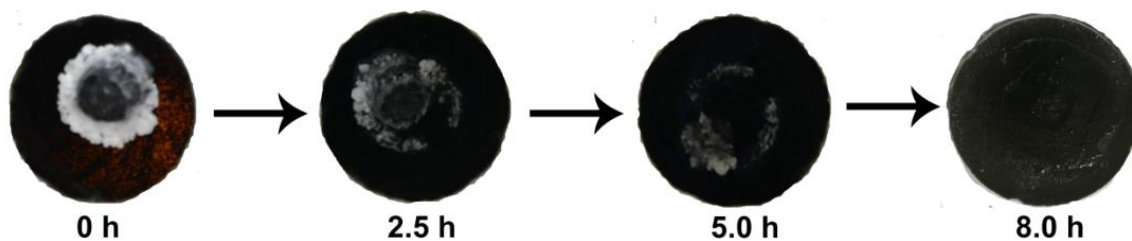

**Fig. S5** Spontaneous dissolution & diffusion of the precipitated NaCl (during 10 h of continuous solar evaporation of 7.5 wt% NaCl solution under 1 sun) on the top surface of the evaporator<sup>14.0</sup> back to the bulk saline water (7.5 wt% NaCl solution) via the superhydrophilic shell under the light off condition.

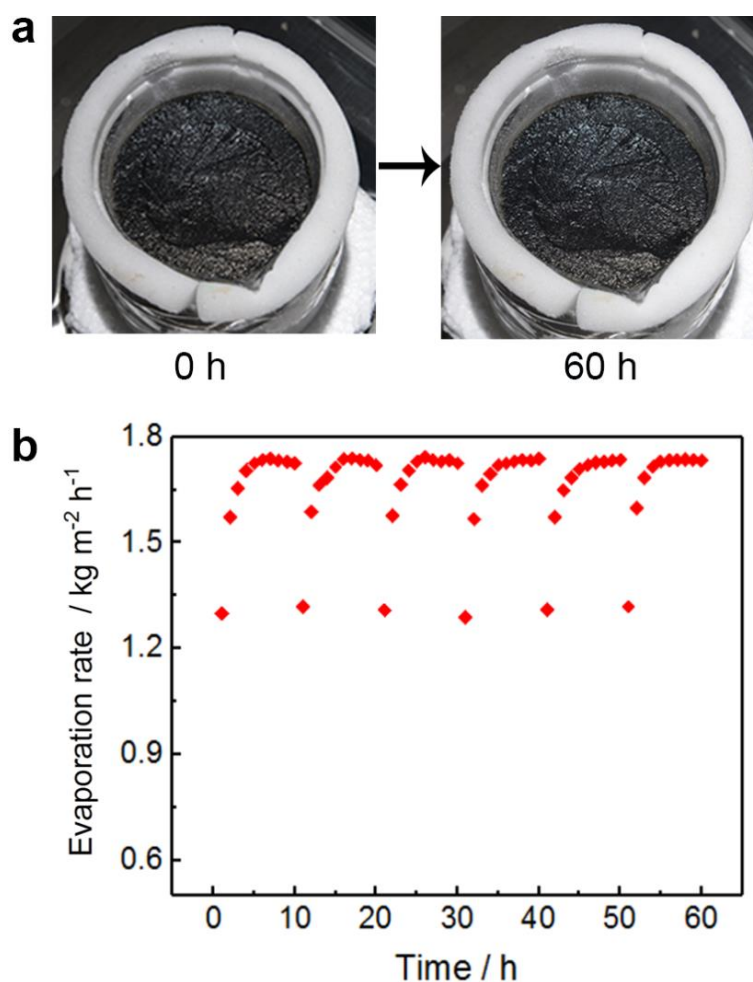

**Fig. S6** (a) Photographs and (b) evaporation rate of the evaporator<sup>12.0</sup> during the 60 h continuous solar desalination of seawater (Bohai Sea) under 1 sun. The seawater was replenished every 10 h during the test.

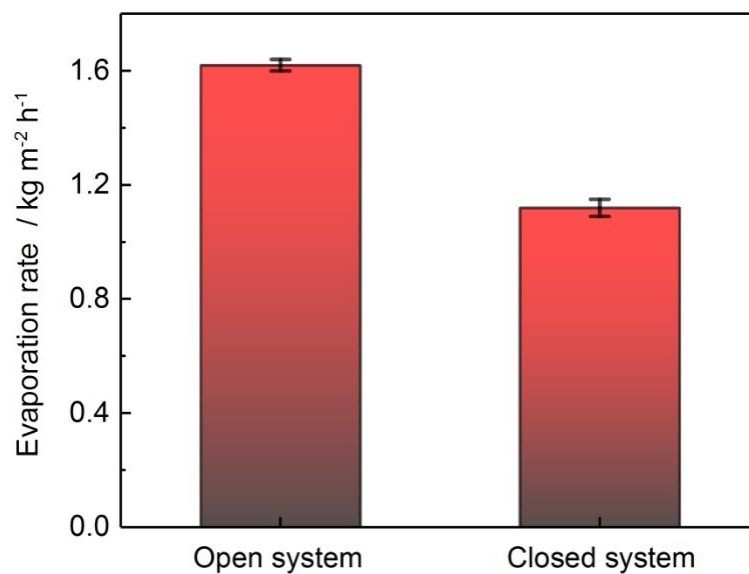

**Fig. S7** Average evaporation rate of 3.5 wt% NaCl solution during 10 h of continuous solar evaporation under 1 sun in the presence of the evaporator<sup>6,0</sup> in the open and closed systems.

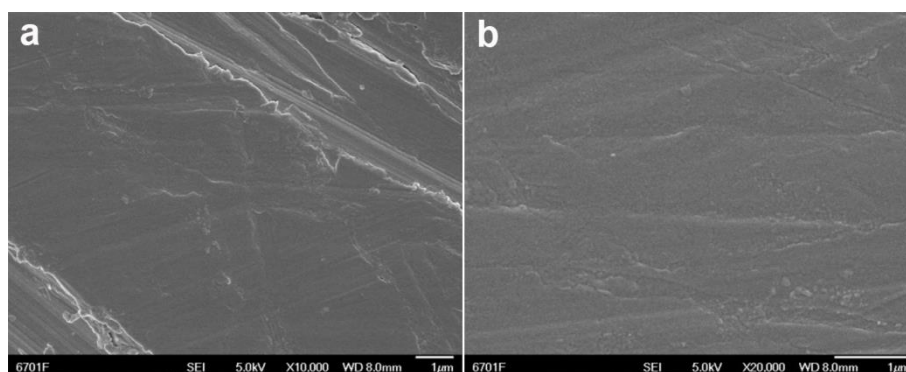

**Fig. S8.** SEM images of (a) bulk water and (b) collected water.

**Table S1.** Evaporation rate and solar-to-vapor efficiency of different CNTs@silicone solar evaporators.

| Evaporators                | Evaporation rate<br>(kg m <sup>-2</sup> h <sup>-1</sup> ) | Dark evaporation rate<br>(kg m <sup>-2</sup> h <sup>-1</sup> ) | Solar-to-vapor efficiency<br>(%) |
|----------------------------|-----------------------------------------------------------|----------------------------------------------------------------|----------------------------------|
| Evaporator <sup>1.0</sup>  | 1.72                                                      | 0.16                                                           | 95.3                             |
| Evaporator <sup>2.0</sup>  | 1.60                                                      | 0.13                                                           | 89.8                             |
| Evaporator <sup>4.0</sup>  | 1.52                                                      | 0.12                                                           | 85.6                             |
| Evaporator <sup>6.0</sup>  | 1.45                                                      | 0.11                                                           | 81.2                             |
| Evaporator <sup>8.0</sup>  | 1.40                                                      | 0.12                                                           | 78.2                             |
| Evaporator <sup>10.0</sup> | 1.36                                                      | 0.11                                                           | 76.4                             |
| Evaporator <sup>12.0</sup> | 1.32                                                      | 0.10                                                           | 74.9                             |
| Evaporator <sup>14.0</sup> | 1.28                                                      | 0.10                                                           | 72.1                             |

**Table S2.** The maximum salt-tolerance of different CNTs@silicone solar evaporators in the open and closed systems.

| Evaporators                | Maximum salt-tolerance / wt% |               |
|----------------------------|------------------------------|---------------|
|                            | Open system                  | Closed system |
| Evaporator <sup>6.0</sup>  | 1.0                          | 3.0           |
| Evaporator <sup>8.0</sup>  | 1.5                          | 4.5           |
| Evaporator <sup>10.0</sup> | 2.5                          | 5.0           |
| Evaporator <sup>12.0</sup> | 3.5                          | 6.0           |
| Evaporator <sup>14.0</sup> | 5.0                          | 7.5           |

**Table S3.** Concentration changes of the major cations in simulated seawater and wastewater after solar evaporation using the evaporator<sup>4,0</sup>, and the corresponding removal efficiencies.

| Cations          | Initial concentration<br>/ (mg L <sup>-1</sup> ) | Concentration in<br>collected water / (mg L <sup>-1</sup> ) | Removal efficiency<br>/ % |
|------------------|--------------------------------------------------|-------------------------------------------------------------|---------------------------|
| Na <sup>+</sup>  | 10525                                            | 7.62                                                        | 99.93                     |
| Mg <sup>2+</sup> | 1106                                             | 2.1                                                         | 99.81                     |
| K <sup>+</sup>   | 385                                              | 0.82                                                        | 99.79                     |
| Ca <sup>2+</sup> | 398                                              | 0.75                                                        | 99.81                     |
| Cu <sup>2+</sup> | 1280                                             | 0.1                                                         | 99.99                     |
| Zn <sup>2+</sup> | 1300                                             | 0.125                                                       | 99.99                     |

## References

1. G. Ni, G. Li, Svetlana V. Boriskina, H. Li, W. Yang, T. Zhang and G. Chen, *Nature Energy*, 2016, **1**, 16126.
2. K. Yin, S. Yang, J. Wu, Y. Li, D. Chu, J. He and J.-A. Duan, *Journal of Materials Chemistry A*, 2019, **7**, 8361-8367.
3. X. Li, W. Xu, M. Tang, L. Zhou, B. Zhu, S. Zhu and J. Zhu, *Proceedings of the National Academy of Sciences*, 2016, **113**, 13953-13958.
